# Supplementary material for: Gefitinib in Combination with Weekly Docetaxel in Patients with Metastatic Breast Cancer Caused Unexpected Toxicity: Results from a Randomized Phase II Clinical Trial
Source: ISRN Oncol. 2012 May 14;2012:176789. doi: 10.5402/2012/176789 (PMC3361199; doi:10.5402/2012/176789)
Supplement: Supplementary file 1 — Supplementary Table 1 contains information on genomic position, suggested function, associated gene and assay ID for the studied SNPs. [file 176789.f1.pdf]

**Supplementary Table 1. Genotyped SNPs with info on gene association, chromosomal localisation, function of the SNP and the assay id from Applied Biosystems**

| Gene   | SNP-ID    | Function    | Chr | ABI Assay ID   |
|--------|-----------|-------------|-----|----------------|
| CYP2C8 | rs1341164 | Intron      | 10  | C__7537656_10  |
| EPHX1  | rs2234922 | Coding exon | 1   | C__11638783_30 |
| GSTA4  | rs1032419 | 3'UTR       | 6   | C__8910269_10  |
| IGF2   | rs2230949 | Exon        | 11  | C__15853775_20 |
| IL1R2  | rs2236930 | Intron      | 2   | C__15955373_20 |
| MAPK7  | rs1042855 | 3'UTR       | 17  | C__7443511_20  |
| NDUFB4 | rs701992  | 3'UTR       | 3   | C__8761891_10  |
| PRDX4  | rs795491  | Intron X    |     | *              |
| TGFB2  | rs1078985 | Intron      | 3   | C__972343_10   |
| TGFB3  | rs2253316 | Intron      | 1   | C__16066451_10 |
| TPMT   | rs2842951 | Intron      | 6   | C__396305_10   |
|        | rs7886    | Promoter    | 6   | C__12091548_10 |
| XPC    | rs2607737 | Intron      | 3   | C__1661682_10  |
|        | rs2228001 | 3'UTR       | 3   | C__234284_1    |

\*Manufactures were unable to design an assay for rs795491  
The SNP is located in a repeat rich area of the genome which may explain the diffucutlies.

**Supplementary Table2. Genotype distribution of the SNPs found significantly associated with clinical end-points. Number in brackets indicate percentages within each clinical level.**

| Clinical end-point |          | Genotype distribution |          |          |         |
|--------------------|----------|-----------------------|----------|----------|---------|
| A.                 |          | rs1341164             |          |          |         |
| WHO score (T=8)    |          | AA                    | AT       | TT       | p-value |
| 0                  | 1 (50.0) |                       | 0        | 1 (50.0) |         |
| 1                  | 8 (88.9) | 1 (11.1)              |          | 0        |         |
| 2                  | 2 (50.0) | 2 (50.0)              |          | 0        | 0,044   |
| B.                 |          | rs701992              |          |          |         |
| WHO score (T=0)    |          | AA                    | AT       | TT       | p-value |
| 0                  | 5 (55.6) | 4 (44.4)              |          | 0        |         |
| 1                  | 3 (42.9) | 4 (57.1)              |          | 0        |         |
| 2                  | 1 (50.0) | 0                     | 1 (50.0) |          | 0,055   |
